# Supplementary material for: Cr doping regulates FeNi alloy nanoparticle exsolution on Sr 2 Fe 1.1 Ni 0.2 Cr 0.2 Mo 0.5 O 6− δ cathode to facilitate CO 2 electrolysis
Source: Royal Society of Chemistry journal article supplement (doi:10.1039/d5ta09888b), 2026-01-01
Supplement: d5ta09888b1.pdf [file d5ta09888b1.pdf]

**Cr doping regulates FeNi alloy nanoparticles exsolution on  $\text{Sr}_2\text{Fe}_{1.1}\text{Ni}_{0.2}\text{Cr}_{0.2}\text{Mo}_{0.5}\text{O}_{6-\delta}$   
cathode to facilitate  $\text{CO}_2$  electrolysis**

Yongshu Wang,<sup>†ab</sup> Yujia Han,<sup>†b</sup> Zuwei Luo,<sup>b</sup> Xiaohui Hu,<sup>be</sup> Wendian Shi,<sup>ab</sup> Minghao Ma,<sup>d</sup>  
Yuxiang Shen,<sup>d</sup> Houfu Lv,<sup>\*b</sup> Guoxiong Wang,<sup>\*cd</sup> Xinhe Bao<sup>cd</sup>

<sup>a</sup> School of Chemistry and Materials Science, iChEM (Collaborative Innovation Center of Chemistry for Energy Materials), University of Science and Technology of China, Hefei, Anhui Province, 230026, China

<sup>b</sup> Suzhou Laboratory, Suzhou, China

<sup>c</sup> Advanced Institute for Future Energy, Shanghai Key Laboratory of Electrochemical and Thermochemical Conversion for Resources Recycling, State Key Laboratory of Porous Materials for Separation and Conversion, Beijing Laboratory of New Energy Storage Technology, iChEM (Collaborative Innovation Center of Chemistry for Energy Materials), Department of Chemistry, Fudan University, Shanghai, China

<sup>d</sup> State Key Laboratory of Catalysis, iChEM (Collaborative Innovation Center of Chemistry for Energy Materials), Dalian Institute of Chemical Physics, Chinese Academy of Sciences, Dalian, China

<sup>e</sup> College of Chemical Engineering, Nanjing Tech University, Nanjing, 211816, China

<sup>†</sup> These authors contributed equally to this work.

## Computational details

The unit cell of  $\text{Sr}_2\text{Fe}_{1.5}\text{Mo}_{0.5}\text{O}_6$  (SFM) consists of eight Sr atoms, six Fe atom, two Mo atoms, and twenty-four O atoms. The optimized lattice constant of SFM is “ $a=b=c=7.939 \text{ \AA}$ ”. To investigate the  $\text{CO}_2$  electrolysis activities and the segregation energy of metals of the  $\text{Sr}_2\text{Fe}_{1.1}\text{Ni}_{0.2}\text{Cr}_{0.2}\text{Mo}_{0.5}\text{O}_{6-\delta}$  (SFNCM) and SFNCM reduced for 2 h (SFNCM-R), a series of surface models were constructed based on the X-ray diffraction (XRD) and high-resolution transmission electron microscopy (HRTEM) results, including SFM(110), SFCMN (110)- $\text{V}_\text{O}$  (SFNCM), and FeNi/SFNCM(110)- $\text{V}_\text{O}$  (SFNCM-R). SFM(110) were constructed by a  $p(1 \times 1)$  cell with two repeat unit layers. During the calculations of  $\text{CO}_2$  activation, the Cr and Ni atoms were introduced into the surface to simulate SFNCM catalyst. One oxygen atom on the surface was removed to mimic the oxygen vacancy. A  $\text{Fe}_3\text{Ni}_3$  cluster was positioned on the surface of SFNCM to represent the model of exsolved FeNi cluster supported on the perovskite (SFNCM-R). During the calculations, the bottom unit layer was frozen, while the surface unit layer with the  $\text{Fe}_3\text{Ni}_3$  cluster and the adsorbate were relaxed. The optimized surface models are shown in **Figure S15-17**.

The segregation energy ( $E_{\text{seg}}$ ) of M dopant (Fe or Ni) with oxygen vacancy is defined as the difference between the system with M located on the surface and in the bulk by the following formula:

$$E_{\text{seg}} = E_{(M-V_\text{O})\_bulk} - E_{(M-V_\text{O})\_surf}$$

where  $E_{(M-V_\text{O})\_bulk}$  and  $E_{(M-V_\text{O})\_surf}$  are the energy of the system M located in the bulk and on the surface, respectively.

The adsorption energies ( $E_{\text{ads}}$ ) of  $\text{CO}_2$  on oxygen vacancy or interface were estimated by the following formula:

$$E_{\text{ads}} = E_{\text{CO}_2 + \text{support}} - E_{\text{support}} - E_{\text{CO}_2}$$

where  $E_{\text{CO}_2 + \text{support}}$  is the total energy of the support decorated with  $\text{H}_2\text{O}$  molecule,  $E_{\text{support}}$  is the total energy of the support, and  $E_{\text{CO}_2}$  is the total energy of  $\text{CO}_2$  molecule.

The reaction energies ( $\Delta E$ ) of  $\text{CO}_2$  on oxygen vacancy or interface were estimated by the following formula:

$$\Delta E = E_{FS} - E_{IS}$$

where  $E_{FS}$  is the total energy of the support adsorbed with final species,  $E_{IS}$  is the total energy of the support adsorbed with initial species.

The difference charge densities ( $\Delta\rho$ ) of  $\text{CO}_2$  adsorbed on metal or metal oxides could be expressed as:

$$\Delta\rho = \rho_{AB} - \rho_A - \rho_B$$

where  $\rho_{AB}$  is the total charge density of the support adsorbed with  $\text{CO}_2$  molecule,  $\rho_A$  and  $\rho_B$  are the unperturbed charge densities of the support and  $\text{CO}_2$  molecule, respectively.

The  $\text{CO}_2$  electrolysis Faradaic efficiency (FE) was calculated based on the Faraday law from the formula below,

$$FE = \frac{q_{\text{CO}}}{q_{\text{CO}}} \times 100\%$$

where  $q_{CO}$  denotes the experimentally determined CO production rate ( $\text{mL min}^{-1}$ ) obtained via gas chromatography, while  $q_{CO}$  refers to the theoretical value derived from the principle of electrochemical equivalence. The latter is calculated based on the applied current density  $i$  ( $\text{A cm}^{-2}$ ) passing through the electrolysis cell, as follows:

$$q_{CO} = \frac{i(\text{A} \cdot \text{cm}^{-2}) \cdot 60(\text{s} \cdot \text{min}^{-1}) \cdot 22.4 \times 10^3(\text{ml} \cdot \text{mol}^{-1})}{2(\text{equiv} \cdot \text{mol}^{-1}) \cdot 96485(\text{C} \cdot \text{equiv}^{-1})}$$

where  $i$  is the electrolytic current density,  $F$  is Faraday constant ( $96485 \text{ C mol}^{-1}$ ),  $2$  is electron transfer number in electrochemical  $\text{CO}_2$  reduction reaction.

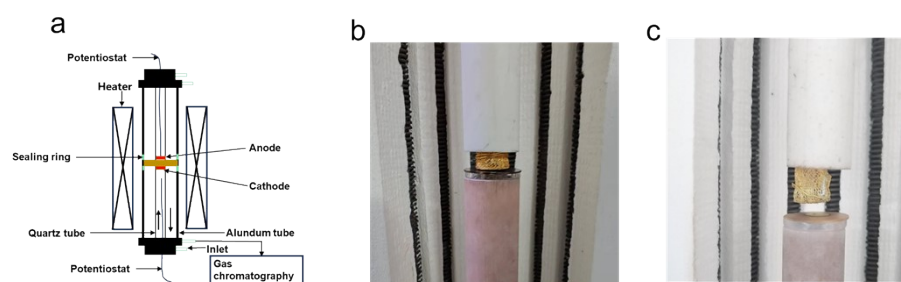

**Figure S1.** (a) Schematic diagram of the SOEC testing device. (b-c) The photograph of the testing device before heating and after CO<sub>2</sub> electrolysis test.

Figure S1a shows a schematic diagram of the test setup: the sealing glass ring begins to melt at 750 °C and remains in a semi molten state at 800 °C, which ensures the airtightness between the cell and the alumina tube.

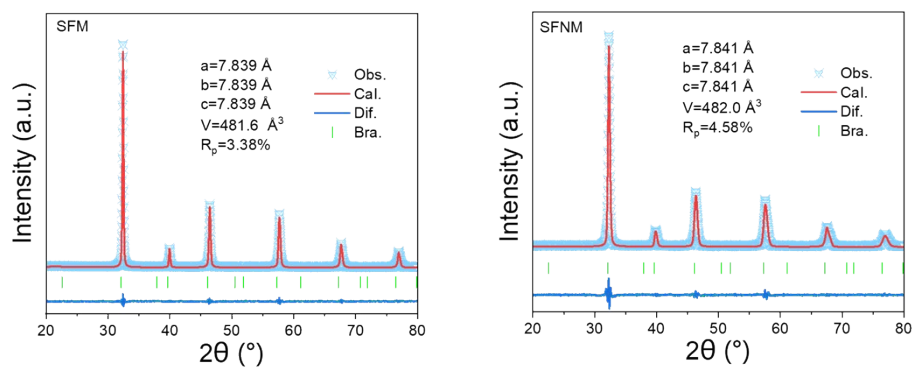

**Figure S2.** Rietveld-refinement XRD patterns of the pristine SFM and  $\text{Sr}_2\text{Fe}_{1.5}\text{Ni}_{0.2}\text{Mo}_{0.5}\text{O}_{6-\delta}$  (SFNM).

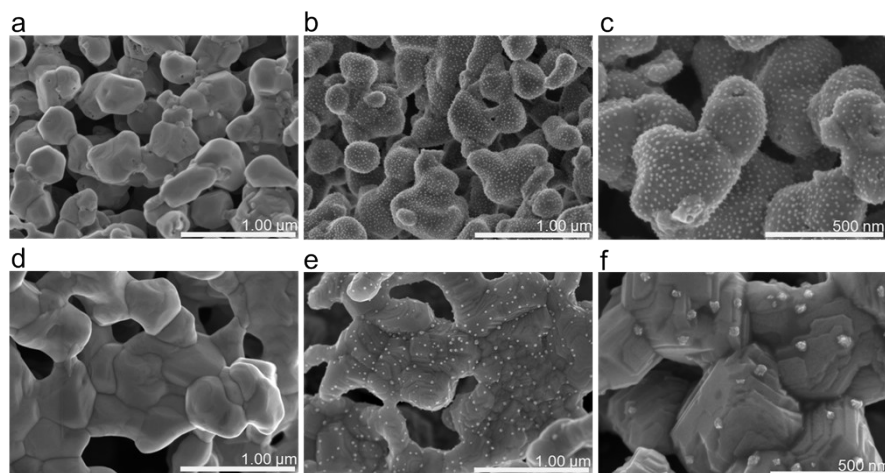

**Figure S3.** (a) SEM images of the pristine SFNCM. (b-c) SEM images of SFNCM powders after reduction at 800 °C for 2 h (SFNCM-R). (d) SEM images of the pristine SFNM. (e-f) SEM images of SFNM powders after reduction at 800 °C for 2 h (SFNM-R).

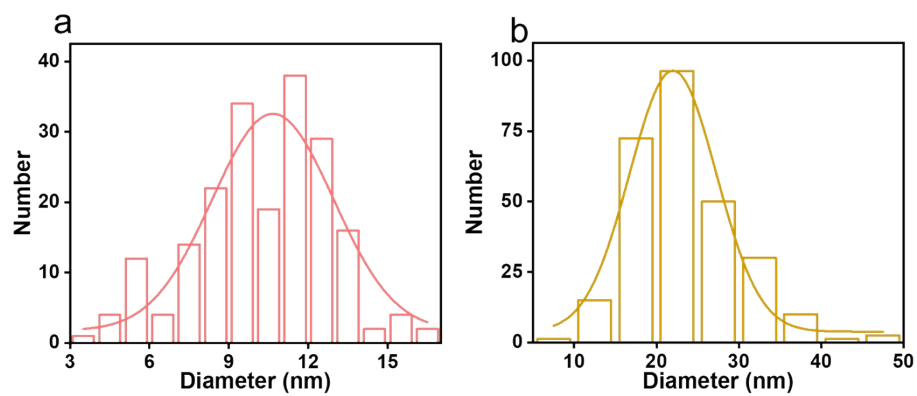

**Figure S4.** Statistics on FeNi alloy nanoparticles size distribution of (a) SFNCM-R (201 NPs were counted, Figure 2d) and (b) SFNM-R (223 NPs were counted, Figure S3e).

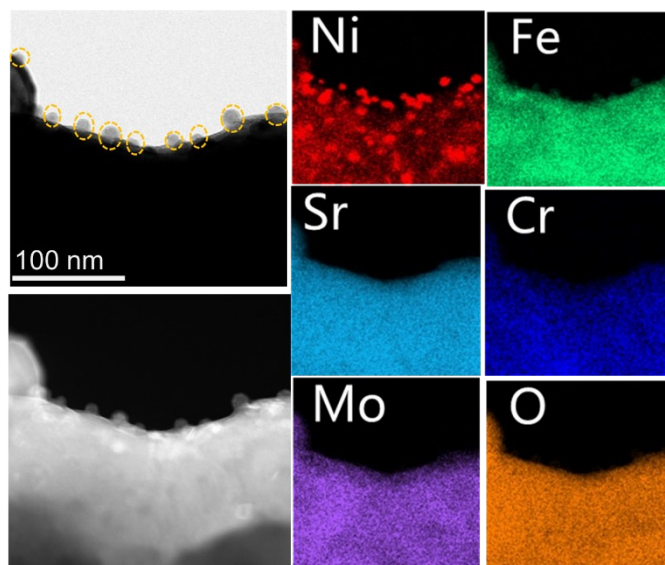

**Figure S5.** Bright-field scanning transmission electron microscopy image and scanning transmission electron microscopy with energy-dispersive X-ray spectroscopy elemental maps of SFNCM-R.



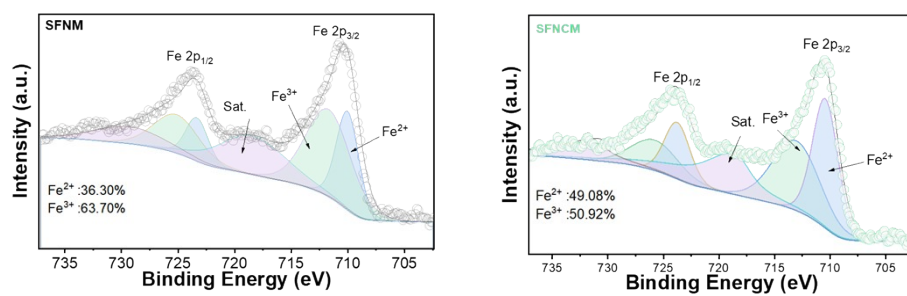

**Figure S6.** The fitted X-ray photoelectron spectroscopy (XPS) spectra of Fe 2p of SFNM and SFNCM.

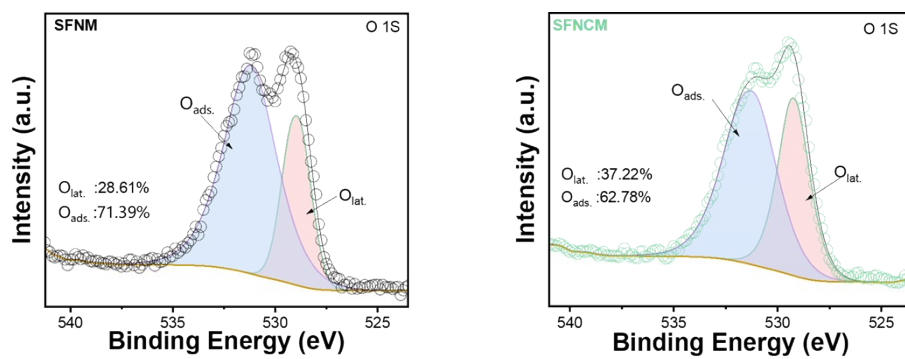

**Figure S7.** The fitted XPS spectra of O 1s of SFNM and SFNCM.

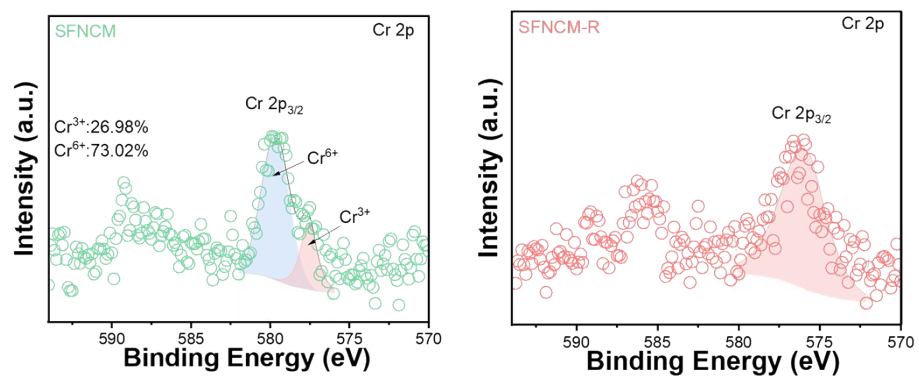

**Figure S8.** The fitted Cr 2p XPS spectra of SFNCM and SFNCM-R.

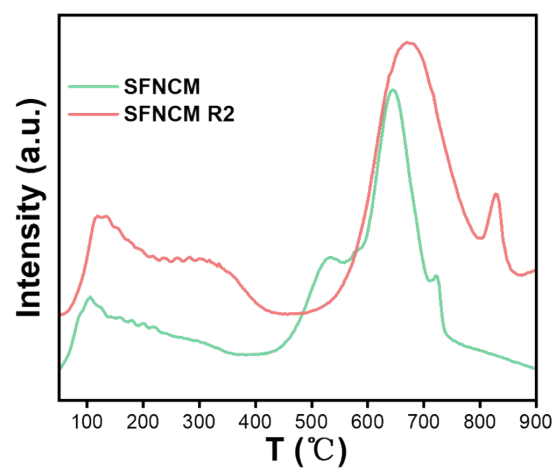

**Figure S9.** CO<sub>2</sub>-TPD profiles of SFNCM and SFNCM-R.

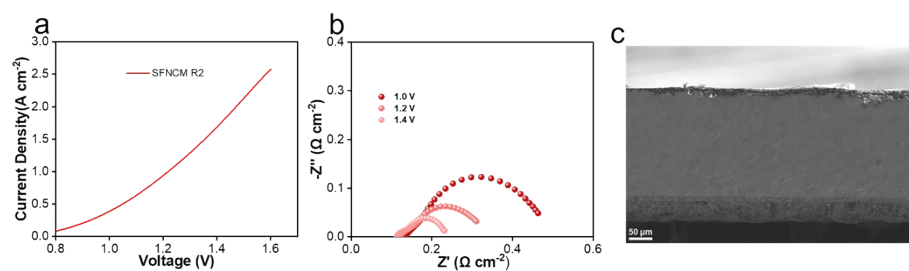

**Figure S10.**  $\text{CO}_2$  electrolysis test using LSGM electrolyte membrane with a thickness of 250  $\mu\text{m}$  at 800  $^\circ\text{C}$  for SFNCM-R of (a) Linear sweep voltammetry curves. (b) Electrochemical impedance spectroscopy (EIS) spectrum. (c) Cross-sectional SEM image of the cell.

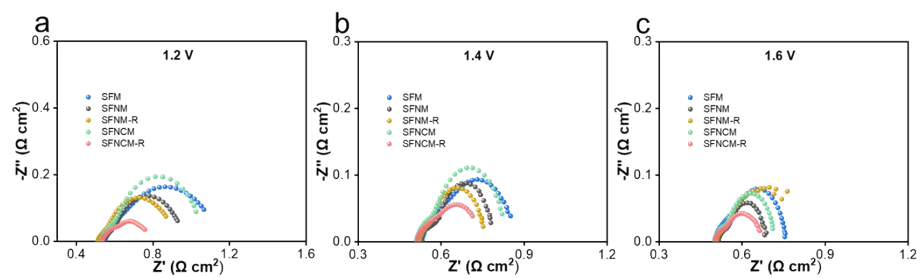

**Figure S11.** EIS of SFM, SFNM, SFNM-R, SFNCM, and SFNCM-R at (a) 1.2 V, (b) 1.4 V, and (c) 1.6 V during CO<sub>2</sub> electrolysis.

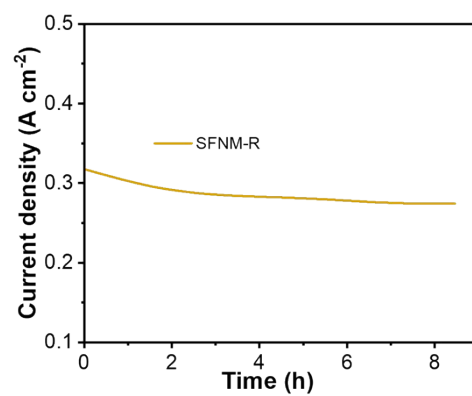

**Figure S12.** Stability test of SFNM-R based SOEC at 800 °C and 1.2 V.

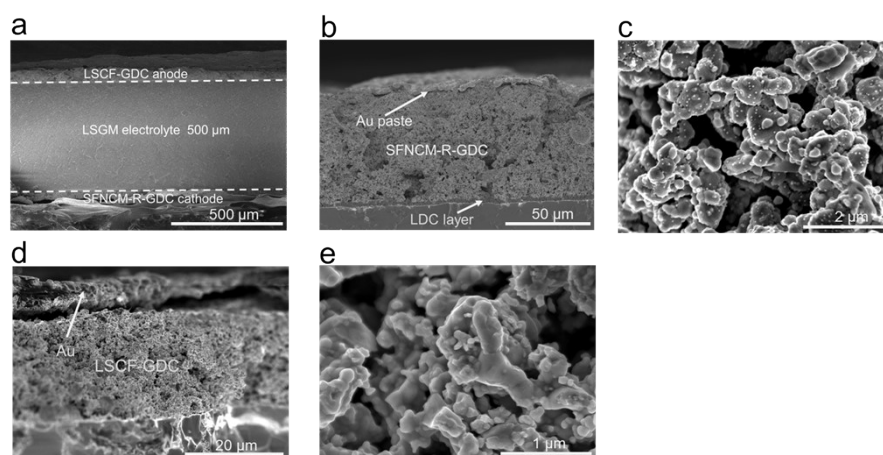

**Figure S13.** SEM images of SFNCM-R based SOEC after stability test for 100 h. (a) Cross-sectional image of the electrolyte supported SOEC. (b-c) SFNCM-R cathode. (d-e) LSCF-GDC anode.



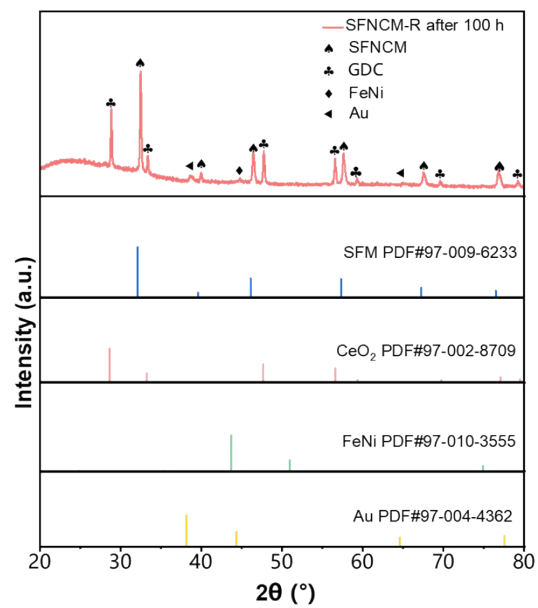

**Figure S14.** XRD patterns of SFNCM-R based cathode after stability test for 100 h.

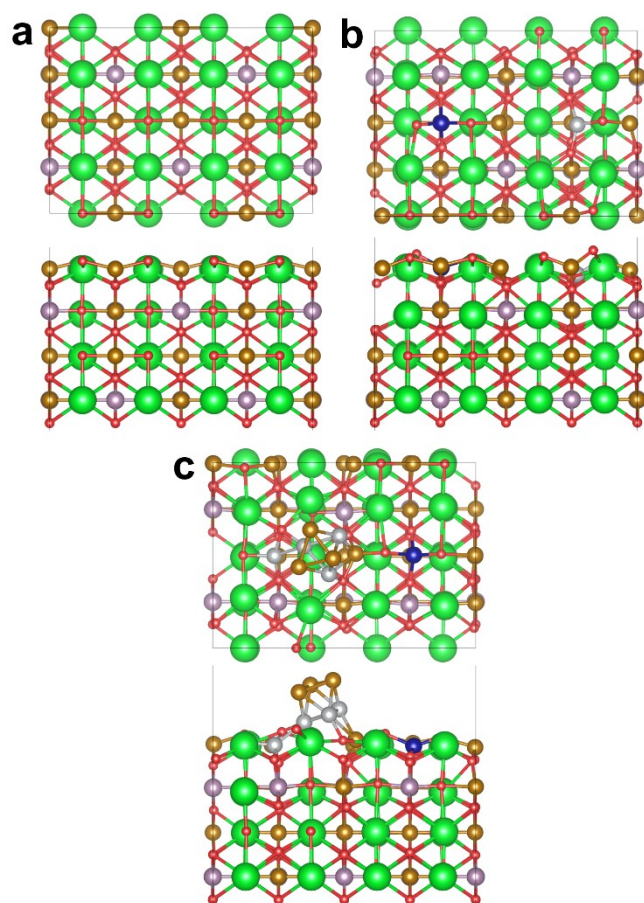

**Figure S15.** Diagram illustration. Top (top) and side (down) view of the optimized (a) SFM(110), (b) SFNCM and (c) SFNCM-R surface models. Sr, Fe, Mo, Ni, Cr, and O atoms are represented by green, yellow, purple, grey, blue and red balls, respectively.

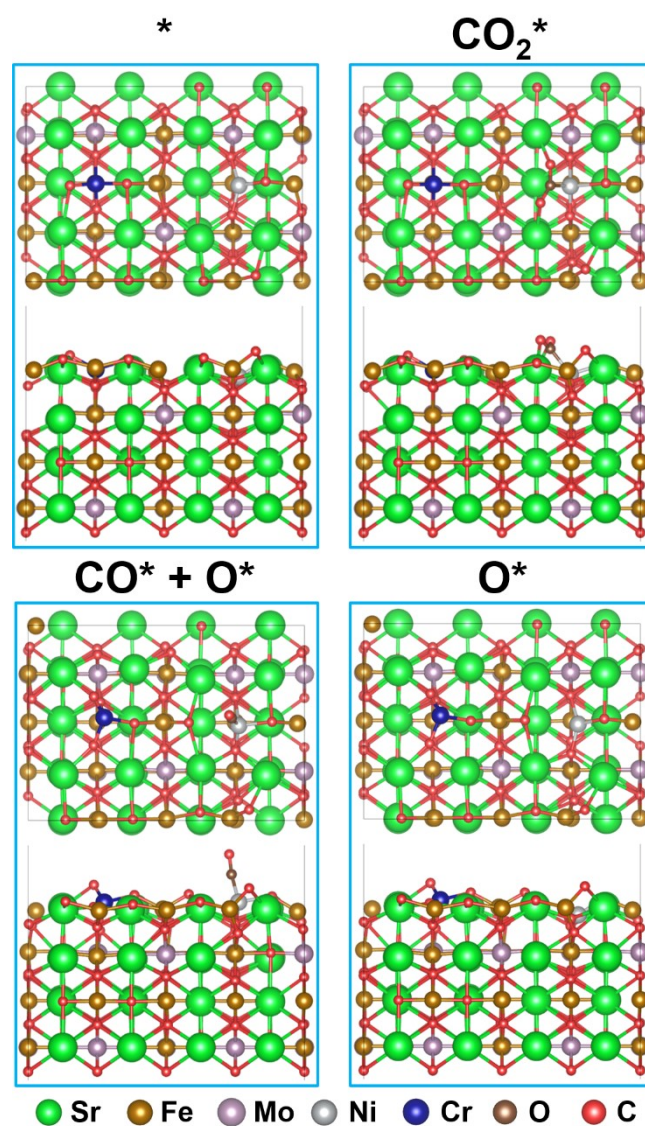

**Figure S16.** Top (up) and side (down) views of the geometric structures of CO<sub>2</sub> electrolysis on the oxygen vacancy of SFNCM. Sr, Fe, Mo, Ni, Cr, C and O atoms are represented by green, yellow, purple, grey, blue, brown and red balls, respectively.

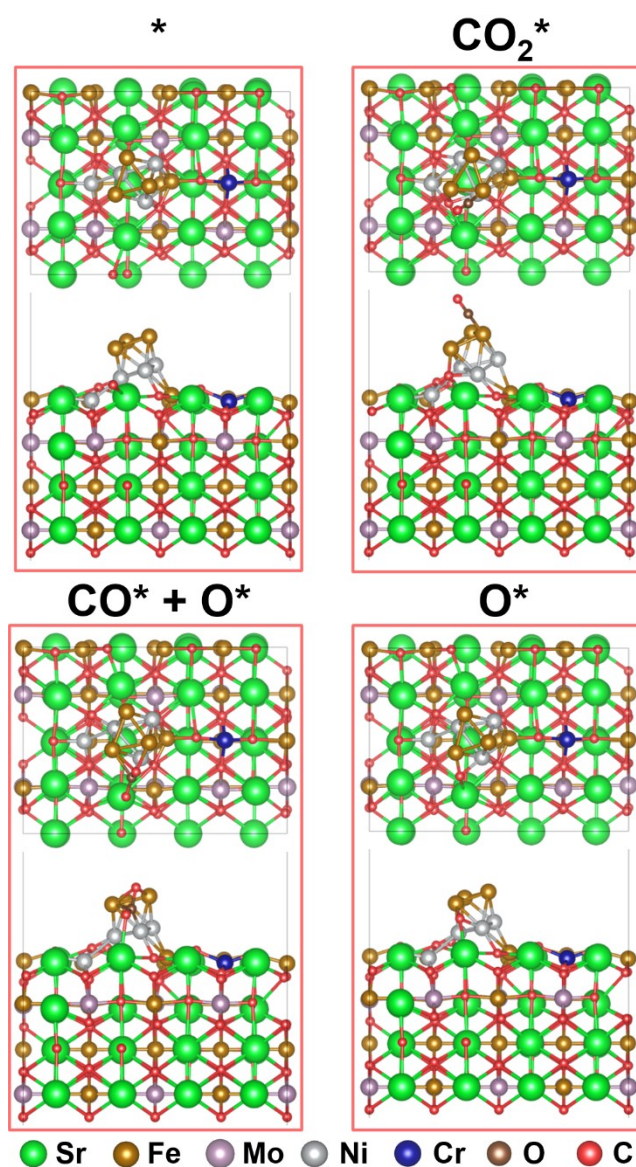

**Figure S17.** Top (up) and side (down) views of the geometric structures of  $\text{CO}_2$  electrolysis on the interface of SFNCM-R. Sr, Fe, Mo, Ni, Cr, C and O atoms are represented by green, yellow, purple, grey, blue, brown and red balls, respectively.
